# Supplementary material for: The enhancement of treatment capacity and the performance of phytoremediation system by fed batch and periodic harvesting
Source: Royal Society of Chemistry journal article supplement (doi:10.1039/d0ra08088h), 2021-01-01
Supplement: d0ra08088h1.pdf [file d0ra08088h1.pdf]

## **Supporting Information**

# **Enhancement of Treatment Capacity and Performance of Phytoremediation System by Fed Batch and Periodic Harvesting**

Yin Sim Ng, Derek Juinn Chieh Chan\*

School of Chemical Engineering, Universiti Sains Malaysia, 14300 Nibong Tebal, Penang,  
Malaysia

\*To whom correspondence should be addressed:

Chan Derek Juinn Chieh  
School of Chemical Engineering  
Universiti Sains Malaysia  
14300 Nibong Tebal, Penang,  
Malaysia  
e-mail: [chderekchan@usm.my](mailto:chderekchan@usm.my)  
Tel: 604-599-6414  
Fax: 604-594-1013

Number of Pages = 10

Number of Figures = 2

Number of Tables = 3

**Table S1:** Quality of fish farm wastewater

| <b>Parameter</b>                                     | <b>Average value</b> | <b>Range</b>  |
|------------------------------------------------------|----------------------|---------------|
| <b>Ammonia, NH<sub>3</sub>-N (mg/L)</b>              | 24.75 ± 1.36         | 21.60 - 28.10 |
| <b>Nitrate, NO<sub>3</sub><sup>-</sup>-N (mg/L)</b>  | <0.3                 | <0.3          |
| <b>Nitrite, NO<sub>2</sub><sup>-</sup>-N (mg/L)</b>  | <0.01                | <0.01         |
| <b>Phosphate, PO<sub>4</sub><sup>3-</sup> (mg/L)</b> | 2.21 ± 0.11          | 1.98 - 2.48   |
| <b>TSS (mg/L)</b>                                    | 83 ± 4               | 75 - 95       |
| <b>Turbidity (NTU)</b>                               | 81.20 ± 3.25         | 71.90 - 86.00 |
| <b>COD (mg/L)</b>                                    | 125 ± 2              | 120 - 130     |
| <b>pH</b>                                            | 7.78 ± 0.01          | 7.74 - 7.80   |

**Table S2:** Composition of Hoagland No. 2 medium<sup>1</sup>

| <b>Chemicals</b>                                     | <b>Concentration (mg/L)</b> |
|------------------------------------------------------|-----------------------------|
| KNO <sub>3</sub>                                     | 50.55                       |
| (NH <sub>4</sub> ) <sub>2</sub> SO <sub>4</sub>      | 94.34                       |
| MgSO <sub>4</sub> ·7H <sub>2</sub> O                 | 246.40                      |
| KH <sub>2</sub> PO <sub>4</sub>                      | 27.22                       |
| Ca(NO <sub>3</sub> ) <sub>2</sub> ·4H <sub>2</sub> O | 153.49                      |
| K <sub>2</sub> SO <sub>4</sub>                       | 243.96                      |
| CaSO <sub>4</sub> ·2H <sub>2</sub> O                 | 232.36                      |
| MnCl <sub>2</sub> ·2H <sub>2</sub> O                 | 0.74                        |
| H <sub>3</sub> BO <sub>3</sub>                       | 1.43                        |
| ZnSO <sub>4</sub> ·7H <sub>2</sub> O                 | 0.11                        |
| CuSO <sub>4</sub> ·5H <sub>2</sub> O                 | 0.04                        |
| Na <sub>2</sub> MoO <sub>4</sub> ·2H <sub>2</sub> O  | 0.01                        |
| FeSO <sub>4</sub> ·7H <sub>2</sub> O                 | 2.51                        |
| Na <sub>2</sub> ·EDTA·2H <sub>2</sub> O              | 3.37                        |

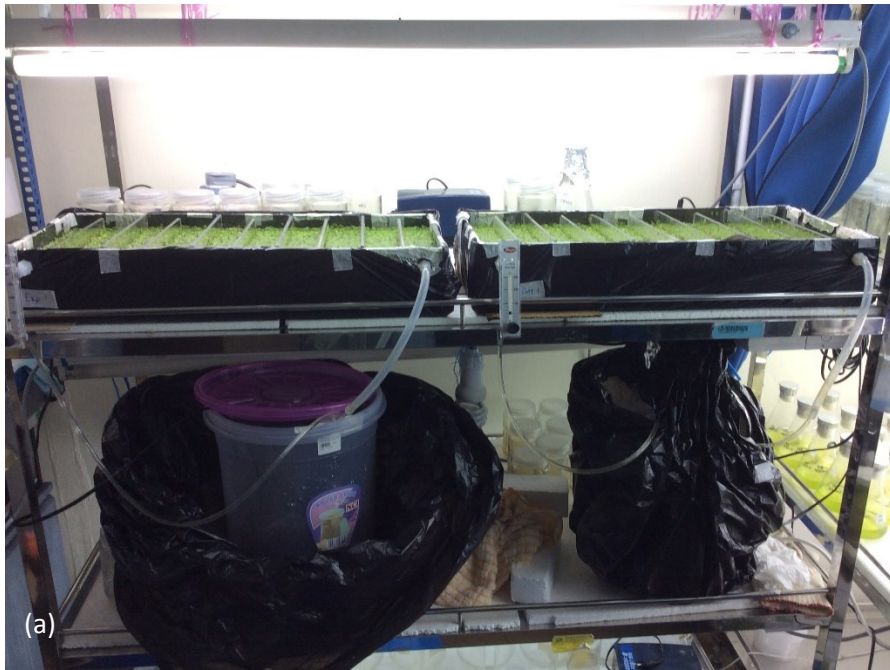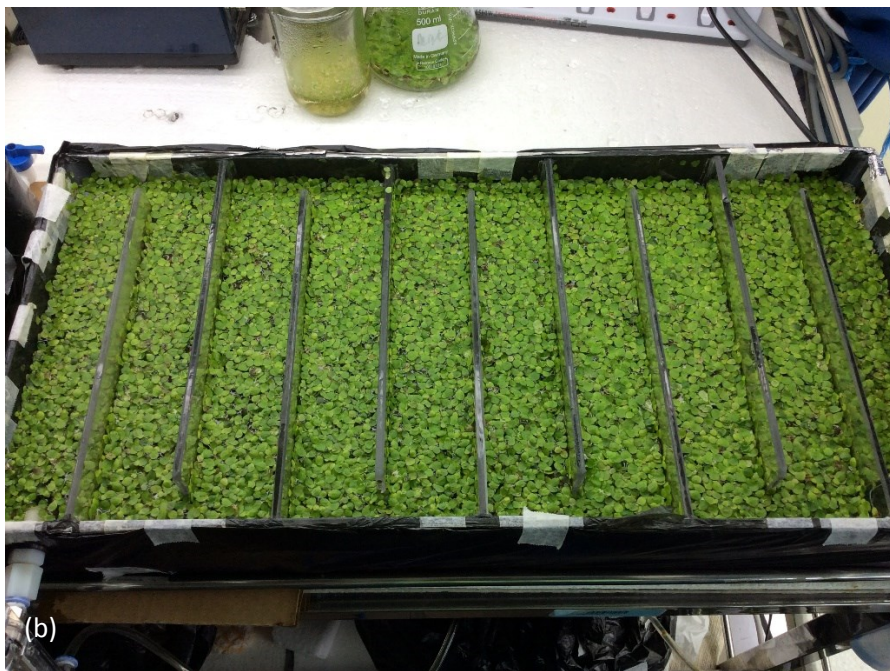

Figure S1: (a) Setup of the raceway pond rig systems in the laboratory with artificial lighting  
(b) Healthy green fronds of *Spirodela polyrhiza* covering surface of fish farm wastewater in the pond rig. Control system and Fed batch and harvesting system utilized *S. polyrhiza* monoculture system.

## Protocol S1: Detailed methods and protocols employed for the water quality assay

### ***Determination of Ammonia, Nitrate and Nitrite***

The ammonia was determined by Salicylate Method (Lovibond method 66) using VARIO Am tube test Reagent (VARIO Ammonia Salicylate F5, VARIO Ammonia Cyanurate F5 powder packs and VARIO Am Diluent Reagent High Range reaction tube), with LOVIBOND Maxidirect MD600, Germany. The nitrate was determined by Cadmium Reduction Method (HACH method 8039) using NitraVer®5 Nitrate Reagent Powder Pillows, with HACH DR2800, USA. The nitrite was determined by Diazotization Method (Lovibond method 272) using VARIO Nitri3 F10 powder pack, with MD600 (Tintometer GmbH, Germany).

### ***Determination of phosphate***

The phosphate was determined by Ascorbic Acid Method (HACH method 8048) using PhosVer® 3 Phosphate Reagent Powder Pillows, with DR2800 (Hach Company, USA) in accordance to USEPA method 365.2 and Standard Method 4500-P-E for wastewater.

### ***COD Determination***

The COD was determined by Dichromate/H<sub>2</sub>SO<sub>4</sub> Method (Lovibond method 131) using COD VARIO tube test Reagent, with MD600 (Tintometer GmbH, Germany). This method complies with Standard Methods for the Examination of Water and Wastewater <sup>2</sup>.

### ***Determination of Turbidity***

The water samples were well-mixed by shaking the centrifuge tube vigorously. A clean cuvette was filled with water sample until the level mark. The cuvette was wiped with lint-free tissue before inserting into measurement cell to measure its turbidity value. The turbidity value

was determined by HI98703 microprocessor turbidity meter (Hanna Instruments, Romania) with range of 0-1000 NTU. The measurement conforms to USEPA Method 180.1 for wastewater and Standard Method 2130B for drinking water.

### ***Determination of TSS***

Well-mixed water samples were prepared by shaking the centrifuge tube vigorously. 30ml samples were filtered through a 47mm diameter weighed Whatman™ glass microfiber filters, Grade GF/C (1.2 μm) in filtration apparatus with a mini air pump and the residues retained were dried in an oven at 105°C for 1 hour. The drying process was repeated until constant weight was gained. The increase in weight of filter represents the total suspended solids. This test was performed based on APHA 2540D.

### ***Determination of pH***

pH measurement was performed using Hanna Edge® pH meter HI-2020, USA. The water sample was continuously stirred with pH probe until the pH reading stabilised.

$$\text{Pollutant removal efficiency}(\%) = \frac{C_0 - C_t}{C_0} \times 100\%$$

(Equation S1)

where  $C_0$  represents initial pollutant concentration and  $C_t$  is the pollutant concentration on day  $t$  of experiment

For control system,

$$\text{Total pollutant removed (mg)} = (C_0 - C_{16}) \times V_0$$

(Equation S2)

For fed batch and harvesting system,

$$\begin{aligned} \text{Total pollutant removed(mg)} \\ = (C_0 - C_4) \times V_0 + (C_{4,i} - C_8) \times V_{4,i} + (C_{8,i} - C_{12}) \times V_{8,i} + (C_{12,i} - C_{16}) \\ \times V_{12,i} \end{aligned}$$

(Equation S3)

where  $C_0$ ,  $C_4$ ,  $C_8$ ,  $C_{12}$  and  $C_{16}$  represent pollutant concentration at day 0, 4, 8, 12 and 16 respectively,  $C_{4,i}$ ,  $C_{8,i}$  and  $C_{12,i}$  show the pollutant concentration after replenished with fresh wastewater at day 4, 8 and 12,  $V_0$  represents wastewater volume at day 0 while  $V_{4,i}$ ,  $V_{8,i}$  and  $V_{12,i}$  are wastewater volume after replenished with fresh wastewater at day 4, 8 and 12.

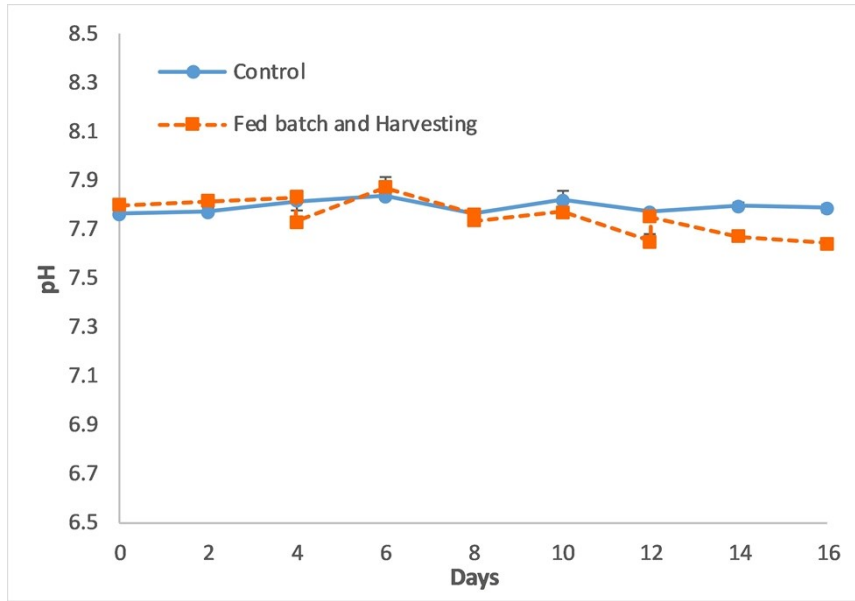

Figure S2: pH profile of fish farm wastewater in *S. polyrhiza* monoculture systems with fed batch and periodic harvesting, and without fed batch and periodic harvesting (control) during 16 days of treatment study.



**Table S3:** Summary of treatment capacity and performance for control system and fed batch and harvesting system.

|                                                                                  | <b>Control system</b>   | <b>Fed batch and harvesting system</b>       |
|----------------------------------------------------------------------------------|-------------------------|----------------------------------------------|
| <b>Volume of wastewater treated/processed/discharged</b>                         | 12 L                    | 30 L                                         |
| <b>Ammonia</b><br>(Total removed/<br>removal efficiency/<br>meet 5 ppm limit?)   | 298.20 mg<br>83%<br>yes | 756.60 mg<br>81%<br>yes                      |
| <b>Nitrate</b><br>(% of samples exceeding 10 ppm)                                | 0                       | 18                                           |
| <b>Nitrite</b><br>(% of samples exceeding 1 ppm)                                 | 0                       | 64                                           |
| <b>Phosphate</b><br>(Total removed/<br>removal efficiency/<br>meet 5 ppm limit?) | 21.60 mg<br>68%<br>yes  | 74.88 mg<br>76%<br>yes                       |
| <b>TSS</b><br>(Total removed/<br>removal efficiency/<br>meet 50 ppm limit?)      | 840 mg<br>61%<br>yes    | 4365 mg<br>87%<br>yes                        |
| <b>Turbidity</b><br>(% of decrement compared to initial value)                   | 74 (first 4 days)       | 93 (average percent in the end of all terms) |
| <b>COD</b><br>(Total removed/<br>removal efficiency/<br>meet 80 ppm limit?)      | 1176 mg<br>65%<br>yes   | 5466 mg<br>75%<br>yes                        |

The removal efficiency shown for control system is first 4 days' efficiency while for fed batch and harvesting system, its removal efficiency is shown by the average efficiency in the end of all terms. As for determining whether the level meeting their standard limit, first 4 days' level is used for control system while mean level in the end of all terms is employed for fed batch and harvesting system.

## References

1. Hoagland, D. R.; Arnon, D. I., The water-culture method for growing plants without soil. *Circular. California Agricultural Experiment Station* **1950**, 347, (2nd edit).
2. APHA; AWWA; WEF, *Standard methods for the examination of water and wastewater*. American Public Health Association: Washington (DC), 1992.
